# Supplementary material for: Analgesic Effect of Combined Therapy with the Japanese Herbal Medicine “Yokukansan” and Electroacupuncture in Rats with Acute Inflammatory Pain
Source: MDPI journal article supplement (doi:10.3390/medicines8060031), 2021-06-17
Supplement: s1 [file s1]

## Supplementary Materials: Analgesic Effect of Combined Therapy with the Japanese Herbal Medicine “Yokukansan” and Electroacupuncture in Rats with Acute Inflammatory Pain

Nachi Ebihara, Hideshi Ikemoto, Naoki Adachi, Takayuki Okumo, Taro Kimura, Kanako Yusa, Satoshi Hattori, Atsufumi Manabe, Tadashi Hisamitsu and Masataka Sunagawa

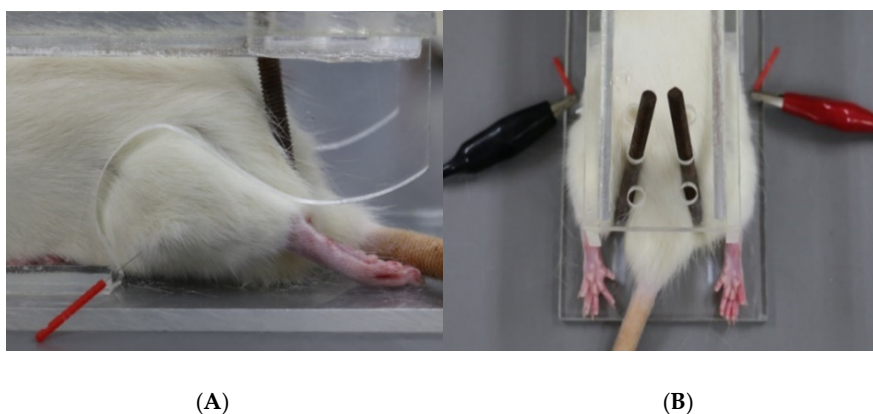

**Figure 1.** Electroacupuncture (EA) in rats. (A) and (B), EA at the bilateral ST36 acupoints.
